# Supplementary material
Source: Springer Nature journal article supplement (https://www.springermedizin.de/resource/supplementary/12879_2010_1300_MOESM1_ESM.pdf/9442300)

% of all fever patients positive for an ILI by Influenza + or = status

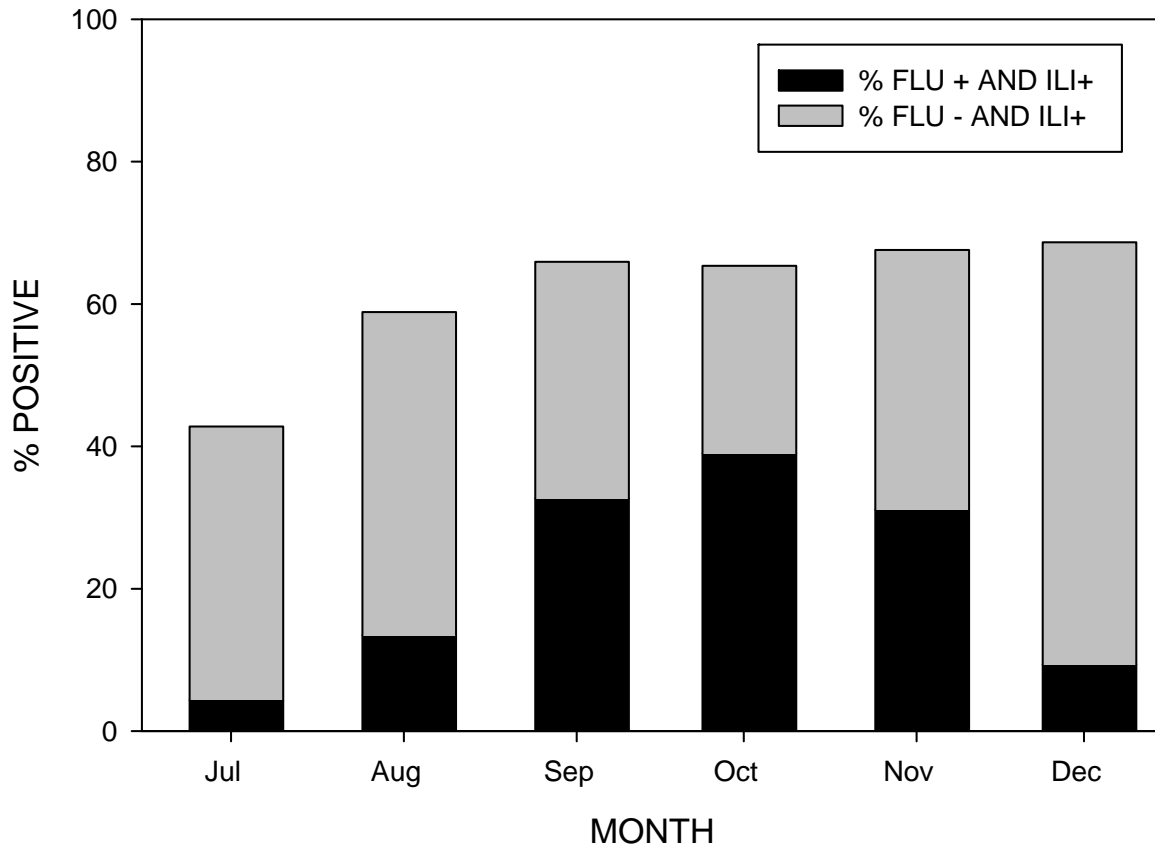

Supplement: MOESM1 [file 9442300]
